# Supplementary material for: Mitochondria COI-based genetic diversity of the leafhopper Amrasca biguttula (Ishida) populations in okra in Chhattisgarh state of India
Source: Research Square preprint supplement (doi:10.21203/rs.3.rs-6922408/v1), 2025-07-09
Supplement: Supplementary file 1 [file afc36409a86c820ed68b7cde.docx]

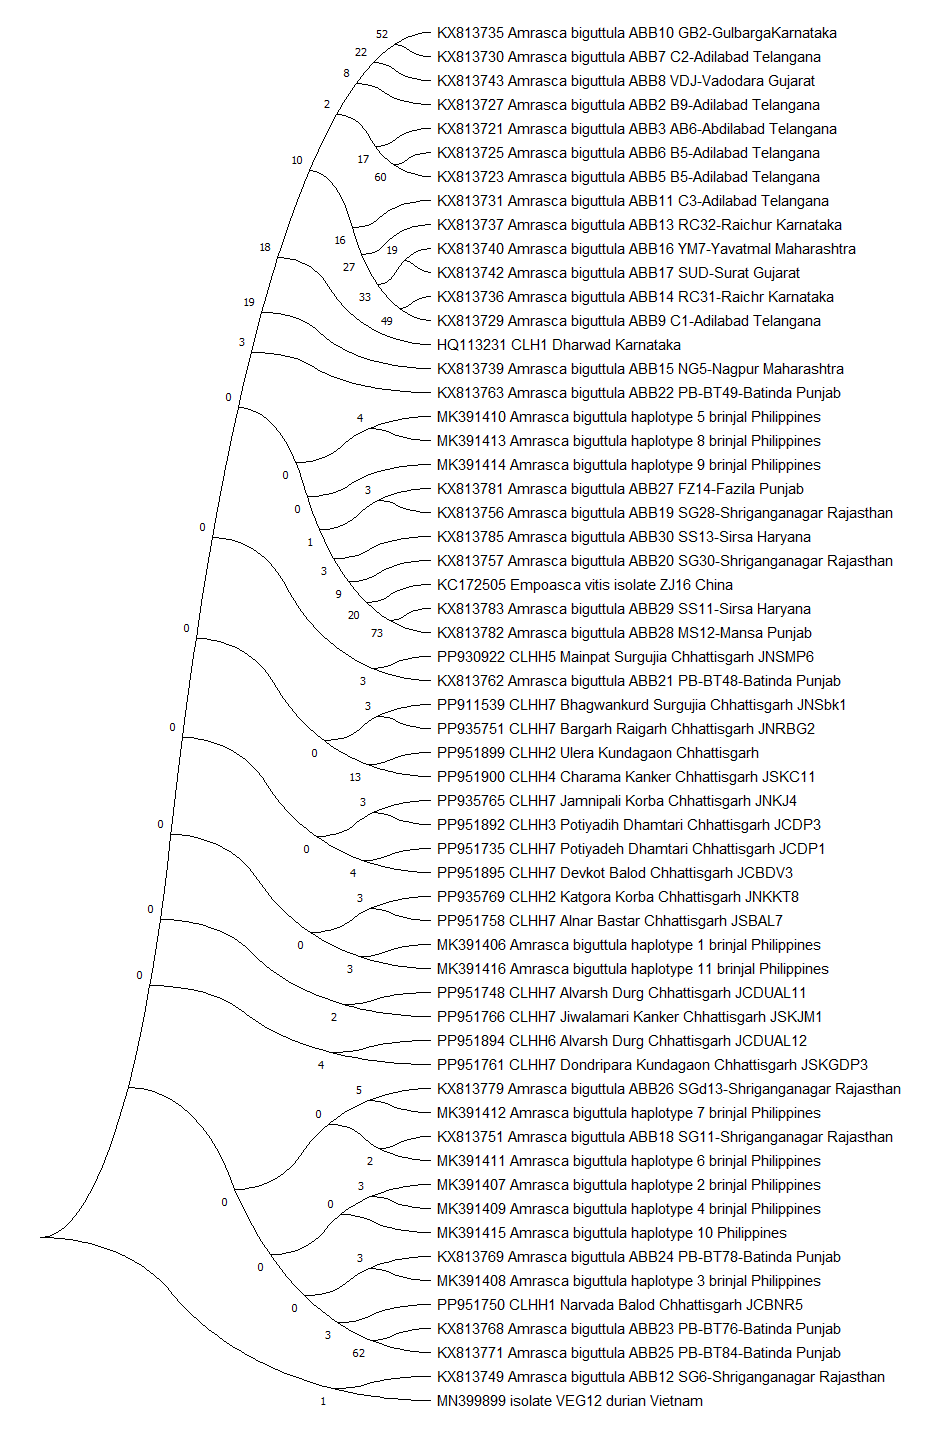


Supplementary material 1: NJ tree of Mt COI gene sequences of *A. biguttula* on cotton, brinjal. Okra, durian.


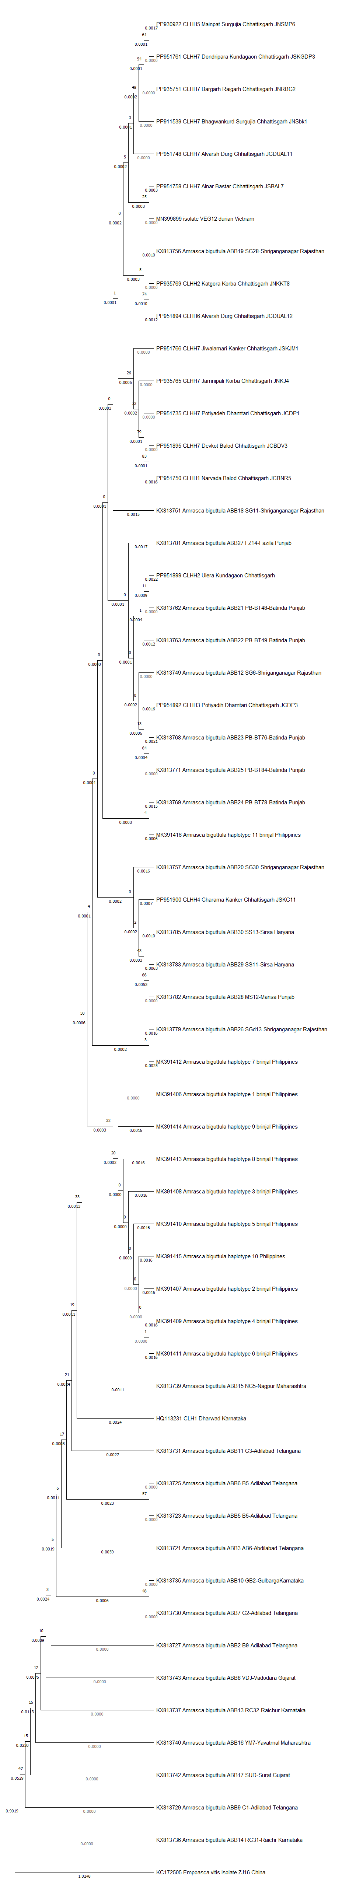


Supplementary material 2: NJ tree of Mt COI gene sequences of *A. biguttula* on cotton, brinjal. Okra, durian with boot strap values.
